# Supplementary material for: Low- vs. High-Dose Neoadjuvant Radiation in Trimodality Treatment of Locally Advanced Esophageal Cancer
Source: Springer Nature journal article supplement (doi:10.1007/s11605-018-4007-3), 2018-10-29
Supplement: MOESM4 [file 16234258]

**Online Only: Appendix Table A2. Clinical and Pathologic Tumor and Nodal Stage Distribution by Radiation Dose**

|  | **Radiation Dose (Gy)** | | | **P*** | **P**** | **Radiation Dose (Gy)** | | | **P*** | **P**** |
| --- | --- | --- | --- | --- | --- | --- | --- | --- | --- | --- |
| **41.4**  **(N=439)** | **45.0**  **(N=2194)** | **50.4**  **(N=6248)** | **41.4**  **(N=439)** | **45.0**  **(N=2194)** | **50.4**  **(N=6248)** |

|  | ***Clinical*** | ***Pathological*** |
| --- | --- | --- |

| **T-Stage** |  |  |  | <0.001 | 0.01 |  |  |  | <0.001 | 0.04 |
| --- | --- | --- | --- | --- | --- | --- | --- | --- | --- | --- |
| **0** | - | - | - | 94 (21.4%) | 359 (16.4%) | 1321 (21.1%) |
| **1** | 18 (4.1%) | 161 (7.3%) | 316 (5.1%) | 75 (17.1%) | 284 (12.9%) | 890 (14.2%) |
| **2** | 114 (26%) | 482 (22%) | 1273 (20.4%) | 69 (15.7%) | 335 (15.3%) | 944 (15.1%) |
| **3** | 302 (68.8%) | 1483 (67.6%) | 4489 (71.8%) | 136 (31%) | 622 (28.4%) | 1799 (28.8%) |
| **4** | 5 (1.1%) | 68 (3.1%) | 170 (2.7%) | 5  (1.1%) | 22  (1%) | 49  (0.8%) |
| **X** | - | - | - | 60 (13.7%) | 572 (26.1%) | 1245 (19.9%) |
| **N-Stage** |  |  |  | <0.001 | 0.02 |  |  |  | <0.001 | <0.001 |
| **0** | 171 (39%) | 891 (40.6%) | 2309 (37%) | 252 (57.4%) | 1072 (48.9%) | 3360 (53.8%) |
| **1** | 204 (46.5%) | 1156 (52.7%) | 3282 (52.5%) | 84 (19.1%) | 480 (21.9%) | 1297 (20.8%) |
| **2** | 55 (12.5%) | 131  (6%) | 576 (9.2%) | 41 (9.3%) | 97  (4.4%) | 382 (6.1%) |
| **3** | 9 (2.1%) | 16 (0.7%) | 81  (1.3%) | 15 (3.4%) | 32  (1.5%) | 118 (1.9%) |
| **X** | - | - | - | 47 (10.7%) | 513 (23.4%) | 1091 (17.5%) |

Data presented as N (%).

Percentages may not add up to 100 due to rounding or missing values.

*Chi-squared p-value for categorical variables for comparison of all 3 dose groups: 41.4 Gy vs. 45.0 Gy vs. 50.4 Gy.

**P-value for comparison of 41.4 Gy vs. 50.4 Gy.
