# Supplementary material for: Low- vs. High-Dose Neoadjuvant Radiation in Trimodality Treatment of Locally Advanced Esophageal Cancer
Source: Springer Nature journal article supplement (doi:10.1007/s11605-018-4007-3), 2018-10-29
Supplement: MOESM6 [file 16234258]

**Online Only: Appendix Table A4. Censored Summary and Median Overall Survival - Adenocarcinoma**

| **Radiation**  **Dose (Gy)** | **Total** | **Deaths** | **Median OS**  **(95% CI)** | **5-Year Survival Rate**  **(95% CI)** | **Log-Rank P** |
| --- | --- | --- | --- | --- | --- |
| **41.4** | 203 | 80 (39.4%) | 52.4 Months (35.1-NE) | 0.451 (0.347-0.549) | 0.14 |
| **45.0** | 1641 | 1002 (61.1%) | 37.2 Months (34.6-40.3) | 0.383 (0.357-0.409) |
| **50.4** | 4417 | 2485 (56.3%) | 39.2 Months (37.0-42.2) | 0.394 (0.377-0.411) |
| **Total** | 6261 | 3567 (57.0%) |  |  |  |

NE=Non-Estimable
