# Supplementary material for: Low- vs. High-Dose Neoadjuvant Radiation in Trimodality Treatment of Locally Advanced Esophageal Cancer
Source: Springer Nature journal article supplement (doi:10.1007/s11605-018-4007-3), 2018-10-29
Supplement: MOESM7 [file 16234258]

**Online Only: Appendix Table A5. Censored Summary and Median Overall Survival – Squamous Cell Carcinoma**

| **Radiation**  **Dose (Gy)** | **Total** | **Deaths** | **Median OS**  **(95% CI)** | **5-Year Survival Rate**  **(95% CI)** | **Log-Rank P** |
| --- | --- | --- | --- | --- | --- |
| **41.4** | 75 | 31 (41.3%) | 144.2 Months (28.8-144.2) | 0.539 (0.401-0.659) | 0.12 |
| **45.0** | 334 | 205 (61.4%) | 39.9 Months (31.4-51.8) | 0.403 (0.346-0.460) |
| **50.4** | 914 | 478 (52.3%) | 46.4 Months (40.7-54.1) | 0.441 (0.404-0.478) |
| **Total** | 1323 | 714 (54.0%) |  |  |  |
